# Supplementary material for: Arabidopsis CCoAOMT1 Plays a Role in Drought Stress Response via ROS- and ABA-Dependent Manners
Source: MDPI journal article supplement (doi:10.3390/plants10050831), 2021-04-21
Supplement: s1 [file s1]

## *Supporting information*

# ***Arabidopsis* CCoAOMT1 plays a role in drought stress response via ROS- and ABA-dependent manners**

Hyun Jin Chun <sup>1,†</sup>, Lack Hyeon Lim <sup>2,†</sup>, Mi Sun Cheong <sup>1,†</sup>, Dongwon Baek <sup>3,†</sup>, Mi Suk Park <sup>3</sup>, Hyun Min Cho <sup>2</sup>, Su Hyeon Lee <sup>2</sup>, Byung Jun Jin <sup>2</sup>, Dong Hyeon No <sup>2</sup>, Ye Jin Cha <sup>2</sup>, Yong Bok Lee <sup>1,2</sup>, Jong Chan Hong <sup>3</sup>, Dae-Jin Yun <sup>4</sup>, and Min Chul Kim <sup>1,2,3,\*</sup>

<sup>1</sup> Institute of Agriculture & Life Science, Gyeongsang National University, Jinju, Korea; hj\_chun@hanmail.net (H.J.C), mscheong@gnu.ac.kr (M.S.C.), yblee@gnu.ac.kr (Y.B.L.)

<sup>2</sup> Division of Applied Life Science (BK21 Four), Gyeongsang National University, Jinju, Korea; dlafkrus@gnu.ac.kr (L.H.L), hmcho86@gnu.ac.kr (H.M.C), leesuhyeon86@gmail.com (S.H.L), scv5789@naver.com (B.J.J), no0513w@naver.com (D.H.N), cdw3280@naver.com (Y.J.C)

<sup>3</sup> Plant Molecular Biology and Biotechnology Research Center, Gyeongsang National University, Jinju, Korea; dw100@hanmail.net (D.B), misugip@hanmail.net (M.S.P), jchong@gnu.ac.kr (J.C.H)

<sup>4</sup> Department of Biomedical Science & Engineering, Konkuk University, Seoul, Korea; djjun@konkuk.ac.kr (D-J.Y)

<sup>†</sup> These authors contributed equally in this study

\* Correspondence: mckim@gnu.ac.kr, Tel.: +82-55-772-1874 (M.C.K.)

## **Supplementary Materials:**

Table S1: Primers used for qRT-PCR

Figure S1: Expression patterns of *CCoAOMT1* during seed germination.

Supplementary Table S1. Primers used for qRT-PCR

| Gene                           | Primer name    | Sequence (5'→3')              |
|--------------------------------|----------------|-------------------------------|
| <i>CCoAOMT1</i><br>(AT4G34050) | CCoAOMT1-qRT-F | 5'-CTGGCTATGGATGTCAACAGAG-3'  |
|                                | CCoAOMT1-qRT-R | 5'-ATCAAGAACGGGAAGAGCAG-3'    |
| <i>RD29B</i><br>(AT5G52300)    | RD29B-qRT-F    | 5'-GTGAAGATGACTATCTCGGTGG-3'  |
|                                | RD29B-qRT-R    | 5'-CACCCTGAGATAATCCGATCC-3'   |
| <i>RD20</i><br>(AT2G33380)     | RD20-qRT-F     | 5'-TTAGCTCCGGTCACCAGTCA-3'    |
|                                | RD20-qRT-R     | 5'-CATGTATGGTTTTGGTAATGTTTCC- |
| <i>RD29A</i><br>(AT5G52310)    | RD29A-qRT-F    | 5'-CCTGAAGTGATCGATGCACCAG-3'  |
|                                | RD29A-qRT-R    | 5'-TGGTGTAATCGGAAGACACGAC-3'  |
| <i>ERD1</i><br>(AT5G51070)     | ERD1-qRT-F     | 5'-CAGATGATGGAGATCTTGAA-3'    |
|                                | ERD1-qRT-R     | 5'-TGCGATCGATGTTTTGT-3'       |
| <i>ABA3</i><br>(AT1G16540)     | ABA3-qRT-F     | 5'-CTTCAGGCTTTACGACATGG-3'    |
|                                | ABA3-qRT-R     | 5'-CCAAACCAAGAGCCATCA-3'      |
| <i>NCED3</i><br>(AT3G14440)    | NCED3-qRT-F    | 5'-TCCAGCTCTTCATTTCCCTAA-3'   |
|                                | NCED3-qRT-R    | 5'-CGGCCATTGAAATAGACCAA-3'    |
| <i>TUBULIN2</i><br>(AT5G62690) | TUBULIN2-qRT-F | 5'-TGGCATCAACTTTCATTGGA-3'    |
|                                | TUBULIN2-qRT-R | 5'-ATGTTGCTCTCCGCTTCTGT-3'    |

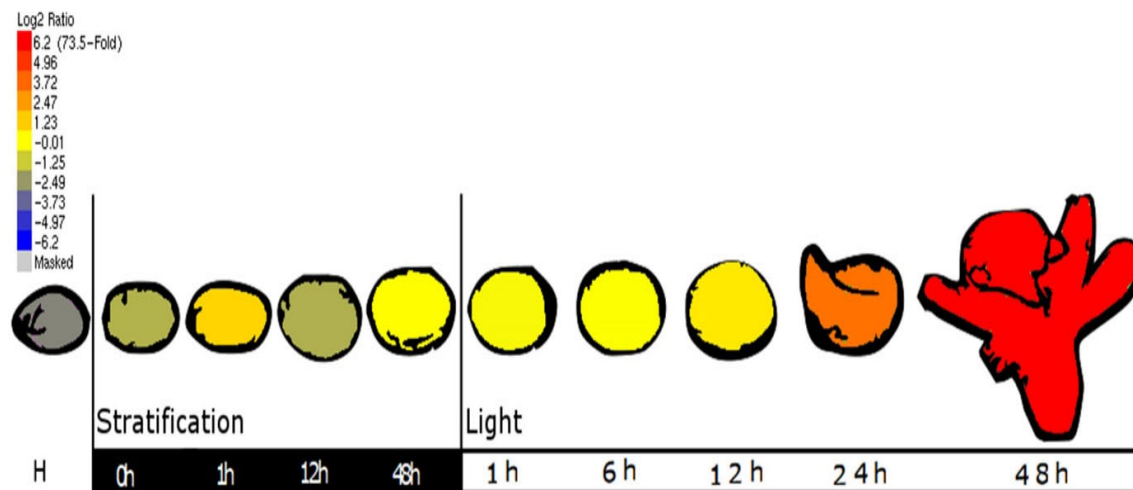

Figure S1. Expression patterns of *CCoAOMT1* during seed germination.

Relative expression patterns of *CCoAOMT1* in data source of germination using *Arabidopsis* eFP Browser at BAR website (<http://bar.utoronto.ca/efp/cgi-bin/efpWeb.cgi>).
